# Supplementary material for: Loss-of-Function Mutations of BCOR Are an Independent Marker of Adverse Outcomes in Intensively Treated Patients with Acute Myeloid Leukemia
Source: MDPI journal article supplement (doi:10.3390/cancers13092095), 2021-04-26
Supplement: s1 [file s1]

**Table S1.** Summary of the 54 genes targeted by the TruSight Myeloid Sequencing Panel (Illumina, San Diego, CA, USA).

| <b>TruSight Myeloid Sequencing Panel</b> |          |       |        |       |
|------------------------------------------|----------|-------|--------|-------|
| ABL1                                     | CEBPA    | HRAS  | MYD88  | SF3B1 |
| ASXL1                                    | CSF3R    | IDH1  | NOTCH1 | SMC1A |
| ATRX                                     | CUX1     | IDH2  | NPM1   | SMC3  |
| BCOR                                     | DNMT3A   | IKZF1 | NRAS   | SRSF2 |
| BCORL1                                   | ETV6/TEL | JAK2  | PDGFRA | STAG2 |
| BRAF                                     | EZH2     | JAK3  | PHF6   | TET2  |
| CALR                                     | FBXW7    | KDM6A | PTEN   | TP53  |
| CBL                                      | FLT3     | KIT   | PTPN11 | U2AF1 |
| CBLB                                     | GATA1    | KRAS  | RAD21  | WT1   |
| CBLC                                     | GATA2    | MLL   | RUNX1  | ZRSR2 |
| CDKN2A                                   | GNAS     | MPL   | SETBP1 |       |
